# Supplementary material for: A Geographic Mosaic of Climate Change Impacts on Terrestrial Vegetation: Which Areas Are Most at Risk?
Source: PLOS journal article supplement (doi:10.1371/journal.pone.0130629), 2015-06-26
Supplement: S4 (10.1371/journal.pone.0130629.s004) [file journal.pone.0130629.s004]

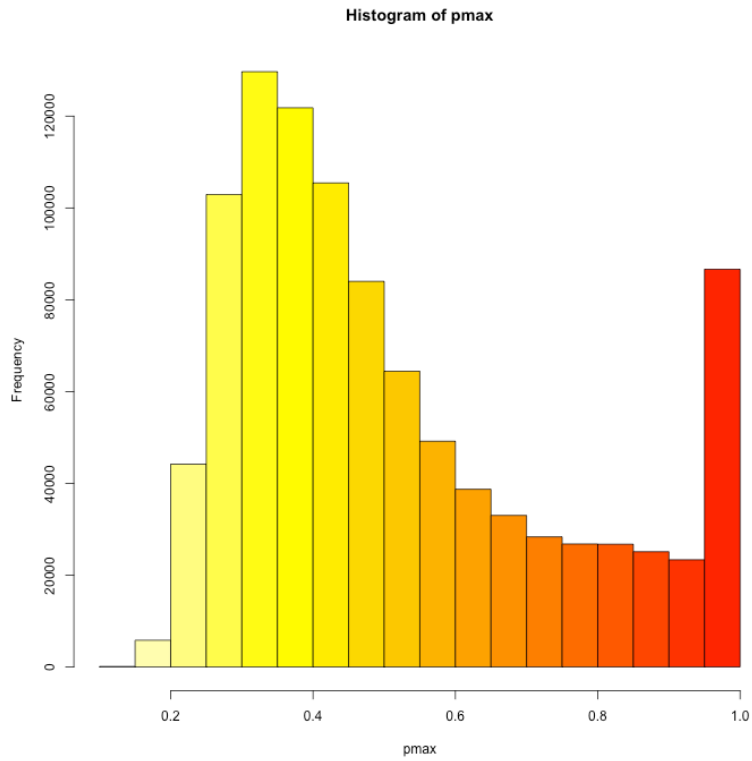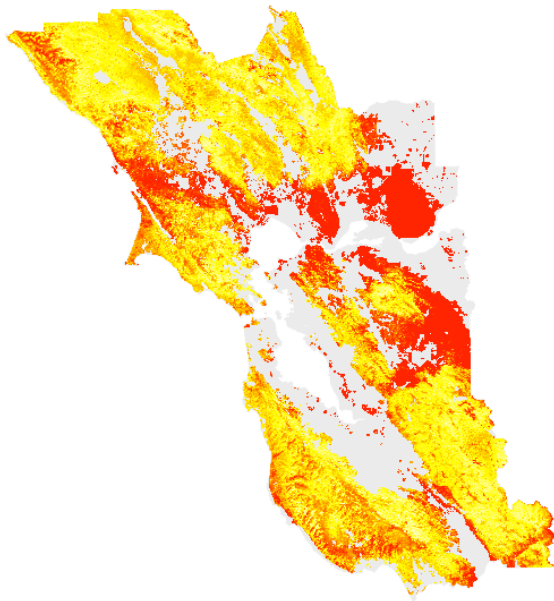

S4 Fig. Modeled probabilities of most likely vegetation type. A) Distribution of  $p_{\max}$  values (probability of the most probable vegetation type). B) Map of  $p_{\max}$  values.
