# Supplementary material for: A Geographic Mosaic of Climate Change Impacts on Terrestrial Vegetation: Which Areas Are Most at Risk?
Source: PLOS journal article supplement (doi:10.1371/journal.pone.0130629), 2015-06-26
Supplement: S7 (10.1371/journal.pone.0130629.s007) [file journal.pone.0130629.s007]

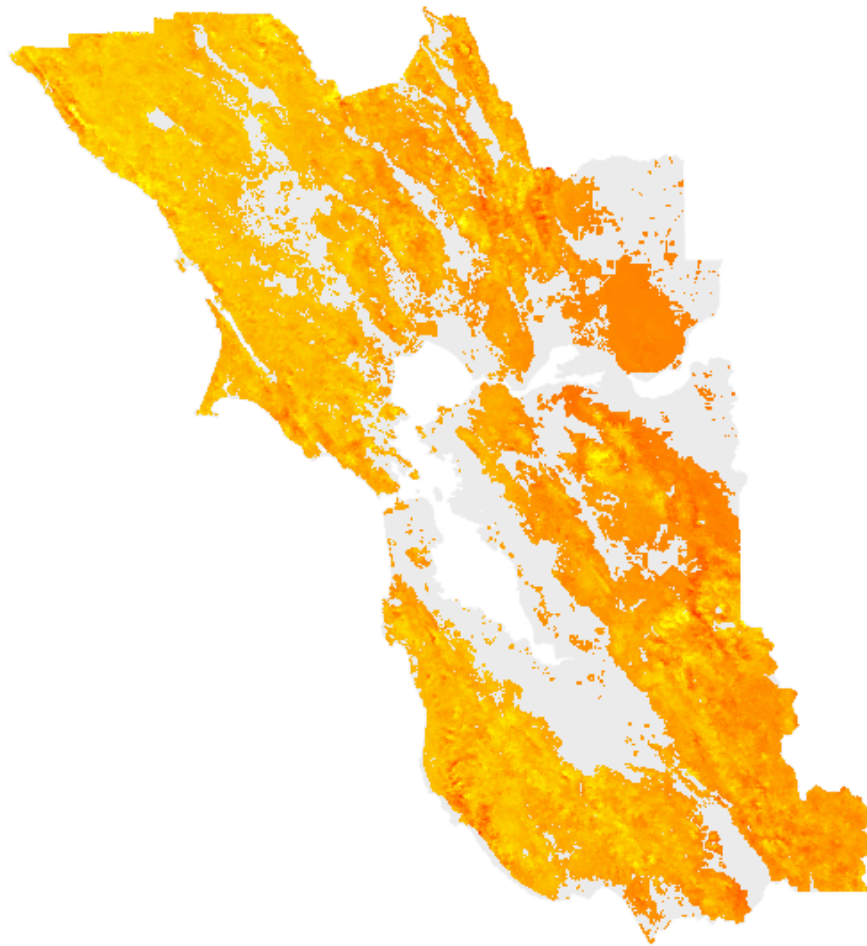

S7 Fig. Geographic variation in the rate of climate change, based on a regression of local changes in MAT vs. the regional means. Higher values (red) indicate more rapid change.
